# Supplementary material for: Blood Pressure Changes in Association with Nimodipine Therapy in Patients with Spontaneous Subarachnoid Hemorrhage
Source: PubMed Central journal article supplement (PMC10499738; doi:10.1007/s12028-023-01760-y), 2023-06-12

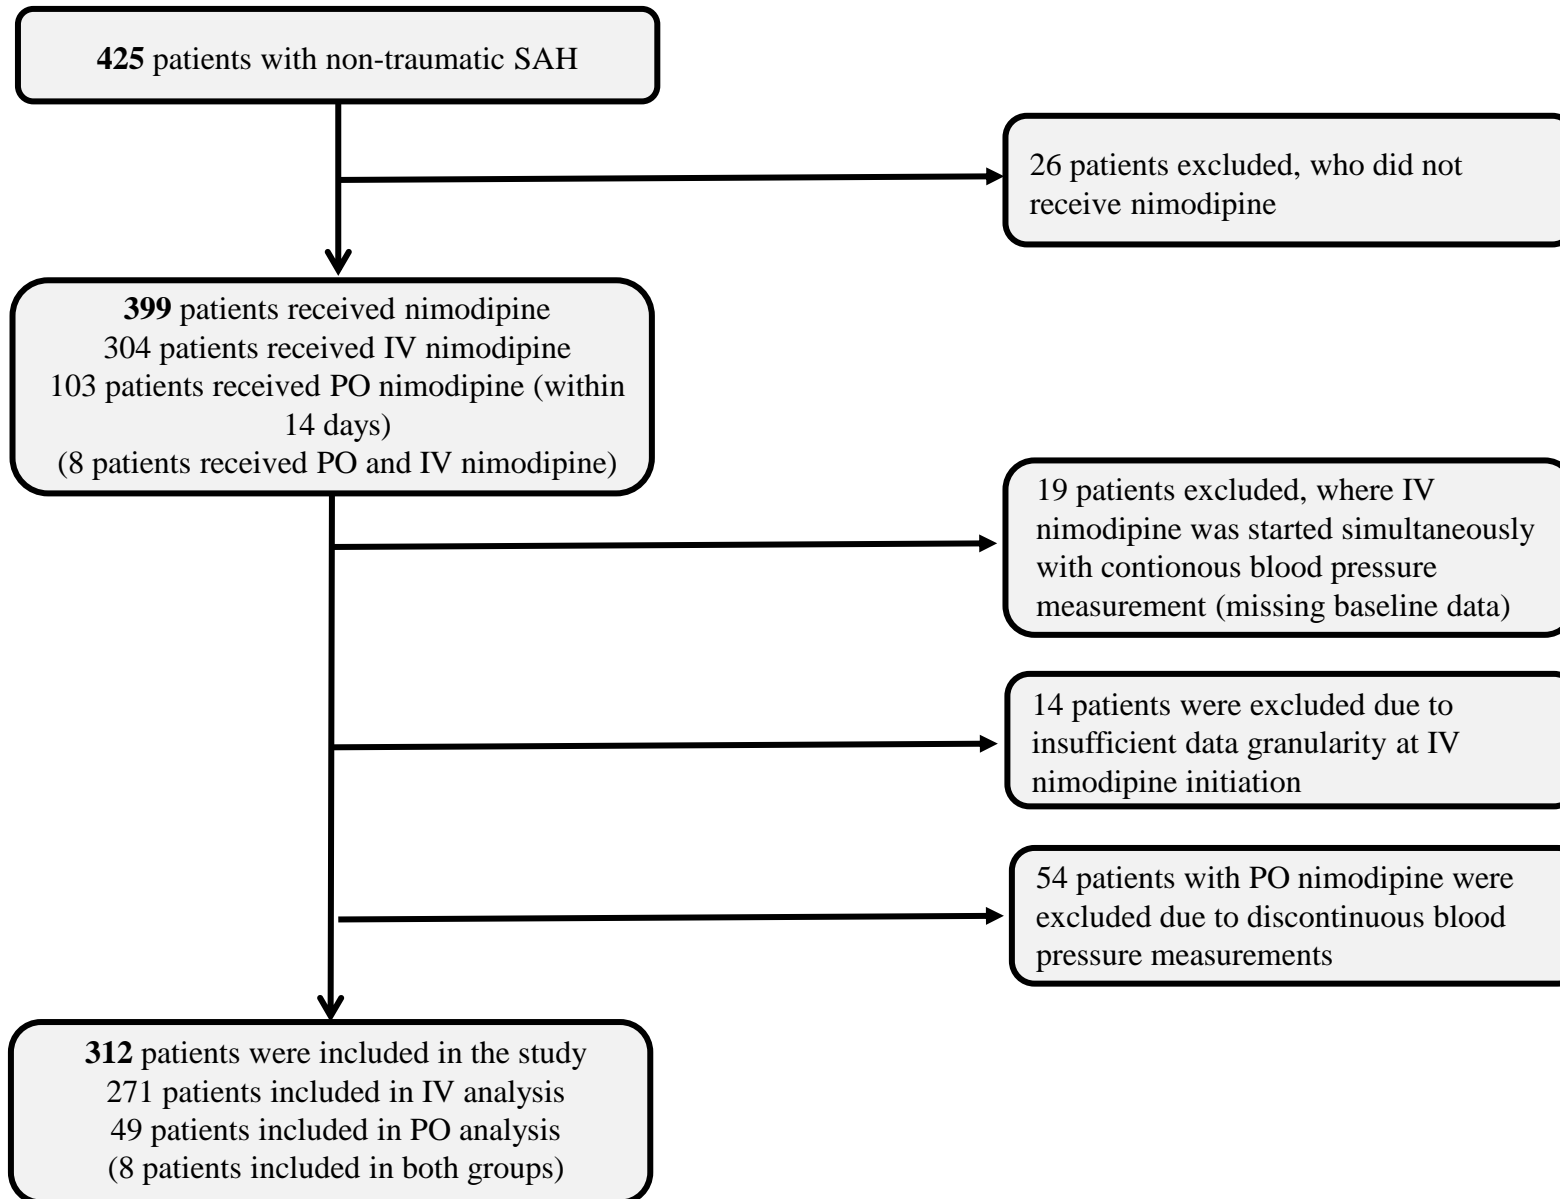

Supplement: 12028_2023_1760_MOESM1_ESM.pdf [file 12028_2023_1760_MOESM1_ESM.pdf]
